# Supplementary material for: Magnetic nanostructures functionalized with a derived lysine coating applied to simultaneously remove heavy metal pollutants from environmental systems
Source: PubMed Central journal article supplement (PMC7832508; doi:10.1080/14686996.2020.1865114), 2021-01-22
Supplement: TSTA_A_1865114_SM5176.pdf [file TSTA_A_1865114_SM5176.pdf]

## Supplemental Material for

### **Magnetic nanostructures functionalized with a derived lysine coating applied to simultaneously remove heavy metal pollutants from environmental systems**

Olivija Plohl<sup>a,\*</sup>, Marjana Simonič<sup>b</sup>, Ken Kolar<sup>a</sup>, Sašo Gyergyek<sup>b,c</sup>, Lidija Fras Zemljič<sup>a</sup>

<sup>a</sup>University of Maribor, Faculty of Mechanical Engineering, Laboratory for Characterization and Processing of Polymers, Smetanova 17, 2000 Maribor, Slovenia

<sup>b</sup>University of Maribor, Faculty of Chemistry and Chemical Engineering, Smetanova 17, 2000 Maribor, Slovenia

<sup>c</sup>Jožef Stefan Institute, Jamova 39, 1000 Ljubljana, Slovenia

Corresponding Author:

E-mail\*: [olivija.plohl@um.si](mailto:olivija.plohl@um.si)

#### **Details of chemicals and reagents used:**

FeSO<sub>4</sub> 7H<sub>2</sub>O, NaOH (> 98%), NH<sub>4</sub>OH (25% aqueous solution) and acetone (≥ 99.5%) were obtained from Honeywell (Seelze, Germany). Fe<sub>2</sub>(SO<sub>4</sub>)<sub>3</sub> 7H<sub>2</sub>O, tetraethylorthosilicate (TEOS, ≥98%), HCl (≥ 37%), L-lysine crystallized (≥98%) and 3-glycidoxypropyltrimethoxysilane (GOPTS, 98%) were ordered from Sigma-Aldrich (Taufkirchen, Germany). Citric acid (≥ 99.5%, water free) was purchased from Roth (Karlsruhe, Germany) and absolute EtOH (anhydrous) was obtained from CarloErba (Val de Reuil, France). All reagents were used as received, without additional purification. Ultrapure water (sourced from Milli-Q, Millipore Corporation, Massachusetts, USA, with a resistivity of 18.2 MΩ cm) was used in all experiments.

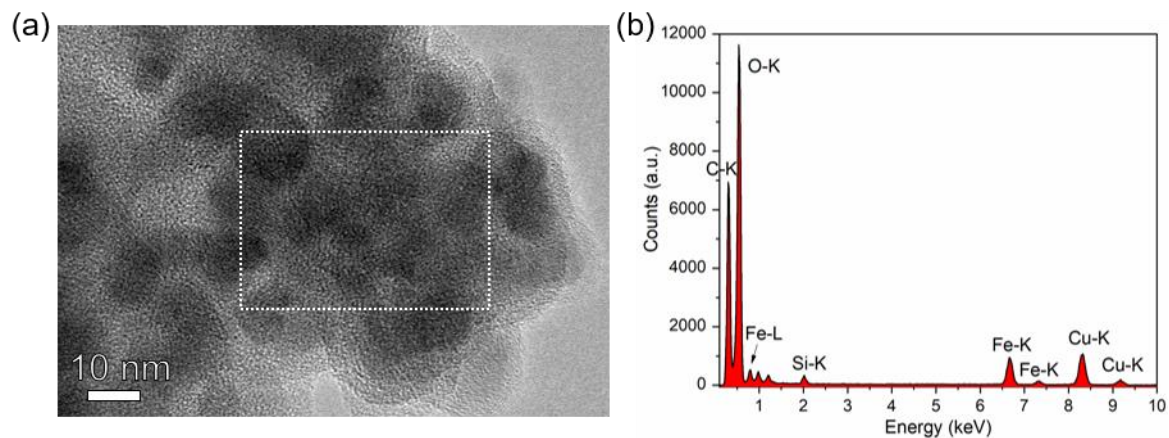

**Figure S1:** TEM image of MNPs@SiO<sub>2</sub>@GOPTS-Lys with white square (a) enclosed, indicating where the corresponding EDXS was acquired, and the results of this are shown in (b).

The presence of Cu is due to a Cu-supported film.

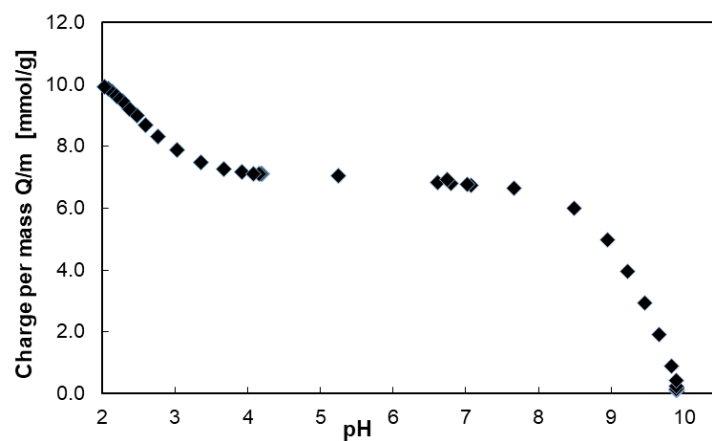

**Figure S2:** Potentiometric titration curve of derivatised lysine.

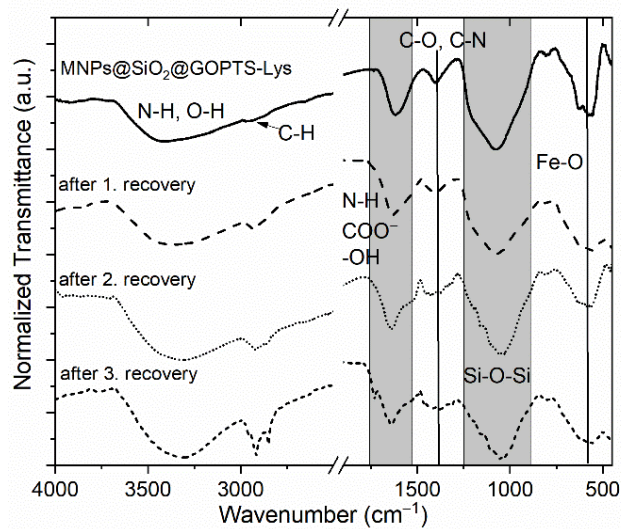

**Figure S3:** ATR-FTIR spectrum of the initial MNP@SiO<sub>2</sub>@GOPTS-Lys and its comparison after different recovery/regeneration steps.

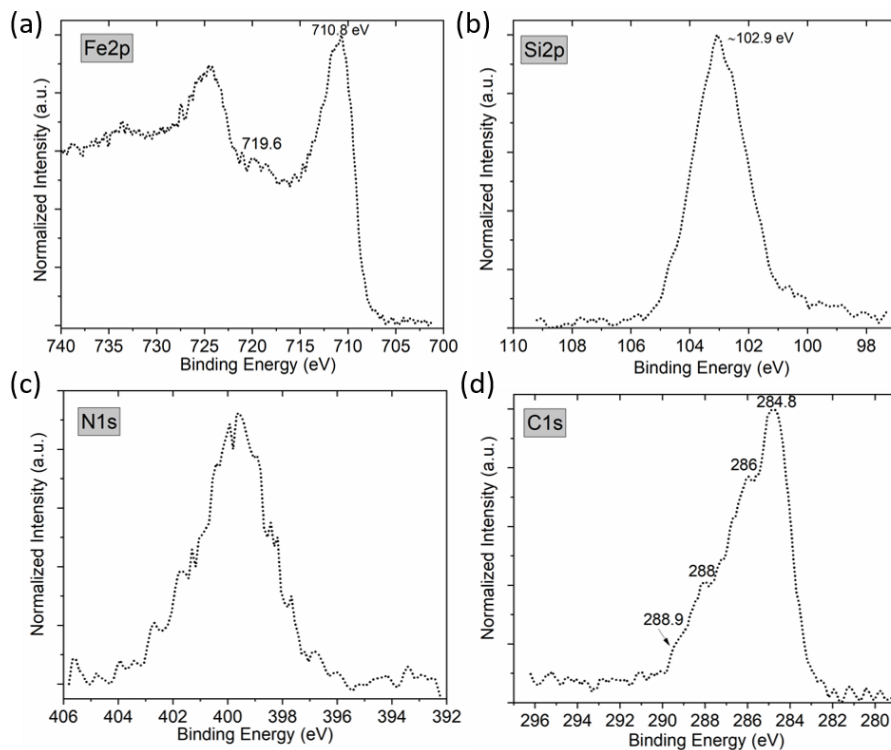

**Figure S4:** High-resolution spectra of a) Fe 2p b) Si 2p, c) N 1s and d) C 1s of MNP@SiO<sub>2</sub>@GOPTS-Lys.

**Table S1.** Comparison of MNPs@SiO<sub>2</sub>@GOPTS-Lys adsorption capacities to other Zn, Cu and Cr adsorbents removal.

| Adsorbent materials                                                             | pH of adsorption | Real/model system                              | Adsorption capacity (mg/g) |      |           |         | References |
|---------------------------------------------------------------------------------|------------------|------------------------------------------------|----------------------------|------|-----------|---------|------------|
|                                                                                 |                  |                                                | Zn                         | Cu   | Cr        | Σmetals |            |
| Crosslinked chitosan with epichlorohydrin                                       | 7                | Model individual metal aqueous system          | 10.2                       | 35.5 | NR        | /       | [1]        |
| Fe <sub>3</sub> O <sub>4</sub> /MnO <sub>2</sub>                                | 6.3              | Model individual metal aqueous system          | 8.1                        | 9.8  | NR        | /       | [2]        |
| Potato peel charcoal                                                            | 6                | Model individual metal aqueous system          | NR                         | 0.39 | NR        | /       | [3]        |
| MWCNTs                                                                          | 9                | Model individual metal aqueous system          | NR                         | 3.49 | NR        | /       | [4]        |
| Mesoporous magnetic carbon nanocomposite fabrics                                | 7                | Model individual metal aqueous system          | NR                         | NR   | 3.74      | /       | [5]        |
| Magnetic Graphene nanocomposites decorated with core@double-shell nanoparticles | 7                | Model individual metal aqueous system          | NR                         | NR   | 1.03      | /       | [6]        |
| Xanthate-modified magnetic chitosan                                             | 5                | Ternary metal system in model aqueous solution | 7.6                        | 26.3 | NR        | 62.5    | [7]        |
| Micron Fe                                                                       | 3                | Heavily contaminated groundwater and           | NR                         | NR   | 1.33-2.16 | /       | [8]        |

|                                                                                                  |             |                                                         |             |            |            |             |                  |
|--------------------------------------------------------------------------------------------------|-------------|---------------------------------------------------------|-------------|------------|------------|-------------|------------------|
|                                                                                                  |             | chromium ore processing residue samples                 |             |            |            |             |                  |
| Micron Fe                                                                                        | 3           | Heavily contaminated groundwater                        | NR          | NR         | 1.53-1.75  | /           | [8]              |
| C-phenylcalix[4]pyrogallolarene                                                                  | 5           | Model individual metal aqueous system                   | NR          | 8.140      | 16.86      | /           | [9]              |
| Magnetic-chitosan nanoparticles                                                                  | 10-11       | Simultaneous removal from real sludge suspension        | 96.2        | 10.1       | NR         | 134.7       | [10]             |
| nZVI-Fe <sub>3</sub> O <sub>4</sub>                                                              | 3           | Model individual metal aqueous system                   | NR          | NR         | 100        | NR          | [11]             |
| Nanoscale Zero-Valent Iron (nZVI) assembled on magnetic Fe <sub>3</sub> O <sub>4</sub> /graphene | 8           | Model individual metal aqueous system                   | NR          | NR         | 66.2       | NR          | [12]             |
| <b>MNPs@SiO<sub>2</sub>@GOPTS-Lys</b>                                                            | <b>10.7</b> | <b>Simultaneous removal from real sludge suspension</b> | <b>17.2</b> | <b>4.8</b> | <b>3.9</b> | <b>24.5</b> | <b>This work</b> |

### Supplemental References

- [1] Chen AH, Liu SC, Chen CY, et al. Comparative adsorption of Cu(II), Zn(II), and Pb(II) ions in aqueous solution on the crosslinked chitosan with epichlorohydrin. J Hazard Mater. 2008;154:184–191.
- [2] Kim E-J, Lee C-S, Chang Y-Y, et al. Hierarchically Structured Manganese Oxide-Coated

- Magnetic Nanocomposites for the Efficient Removal of Heavy Metal Ions from Aqueous Systems. *ACS Appl Mater Interfaces* [Internet]. 2013;5:9628–9634. Available from: <http://pubs.acs.org/doi/abs/10.1021/am402615m>.
- [3] Aman T, Kazi AA, Sabri MU, et al. Potato peels as solid waste for the removal of heavy metal copper(II) from waste water/industrial effluent. *Colloids Surfaces B Biointerfaces*. 2008;63:116–121.
- [4] Stafiej A, Pyrzynska K. Adsorption of heavy metal ions with carbon nanotubes. *Sep Purif Technol*. 2007;58:49–52.
- [5] Zhu J, Gu H, Guo J, et al. Mesoporous magnetic carbon nanocomposite fabrics for highly efficient Cr(vi) removal. *J Mater Chem A*. 2014;2:2256–2265.
- [6] Zhu J, Wei S, Gu H, et al. One-pot synthesis of magnetic graphene nanocomposites decorated with core@double-shell nanoparticles for fast chromium removal. *Environ Sci Technol*. 2012;46:977–985.
- [7] Zhu Y, Hu J, Wang J. Competitive adsorption of Pb(II), Cu(II) and Zn(II) onto xanthate-modified magnetic chitosan. *J Hazard Mater* [Internet]. 2012;221–222:155–161. Available from: <http://dx.doi.org/10.1016/j.jhazmat.2012.04.026>.
- [8] Cao J, Zhang WX. Stabilization of chromium ore processing residue (COPR) with nanoscale iron particles. *J Hazard Mater*. 2006;132:213–219.
- [9] Jumina, Priastomo Y, Setiawan HR, et al. Simultaneous removal of lead(II), chromium(III), and copper(II) heavy metal ions through an adsorption process using C-phenylcalix[4]pyrogallolarene material. *J Environ Chem Eng* [Internet]. 2020;8:103971.

Available from: <https://doi.org/10.1016/j.jece.2020.103971>.

- [10] Bratina B, Šorgo A, Kramberger J, et al. From municipal/industrial wastewater sludge and FOG to fertilizer: A proposal for economic sustainable sludge management. *J Environ Manage*. 2016;183:1009–1025.
- [11] Lv X, Xu J, Jiang G, et al. Highly active nanoscale zero-valent iron (nZVI)-Fe<sub>3</sub>O<sub>4</sub> nanocomposites for the removal of chromium(VI) from aqueous solutions. *J Colloid Interface Sci* [Internet]. 2012;369:460–469. Available from: <http://dx.doi.org/10.1016/j.jcis.2011.11.049>.
- [12] Lv X, Xue X, Jiang G, et al. Nanoscale Zero-Valent Iron (nZVI) assembled on magnetic Fe<sub>3</sub>O<sub>4</sub>/graphene for Chromium (VI) removal from aqueous solution. *J Colloid Interface Sci* [Internet]. 2014;417:51–59. Available from: <http://dx.doi.org/10.1016/j.jcis.2013.11.044>.
